# Supplementary material for: Severe Phenotype in Patients with Large Deletions of NF1
Source: MDPI journal article supplement (doi:10.3390/cancers13122963), 2021-06-13
Supplement: s1 [file s1]

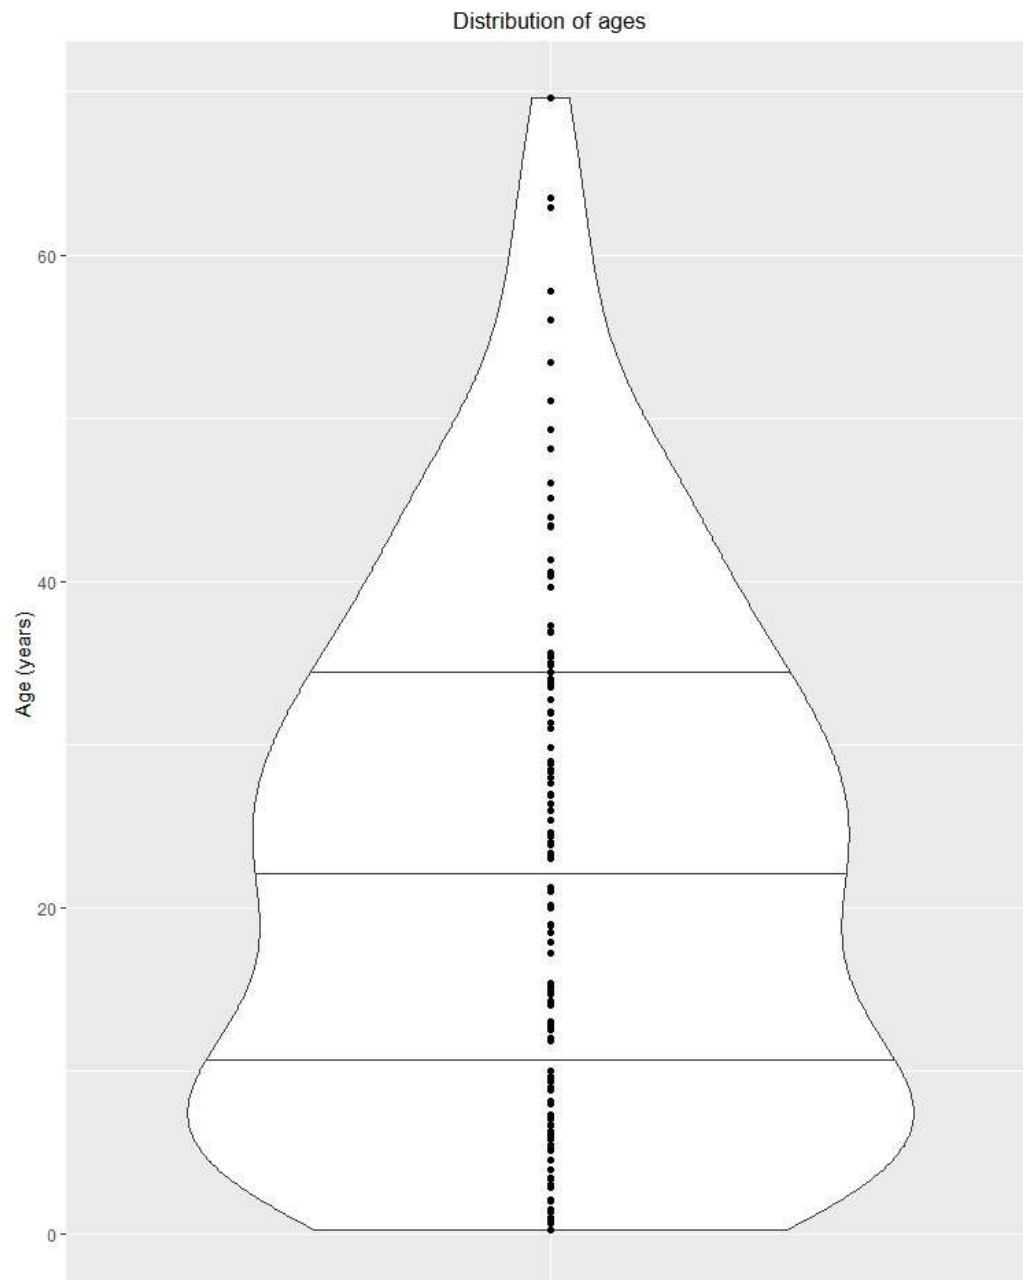

**Figure S1.** Violin plot showing the distribution of ages in the deleted cohort. Median, first and third quartiles are indicated with full lines. Each dot represents one patient.

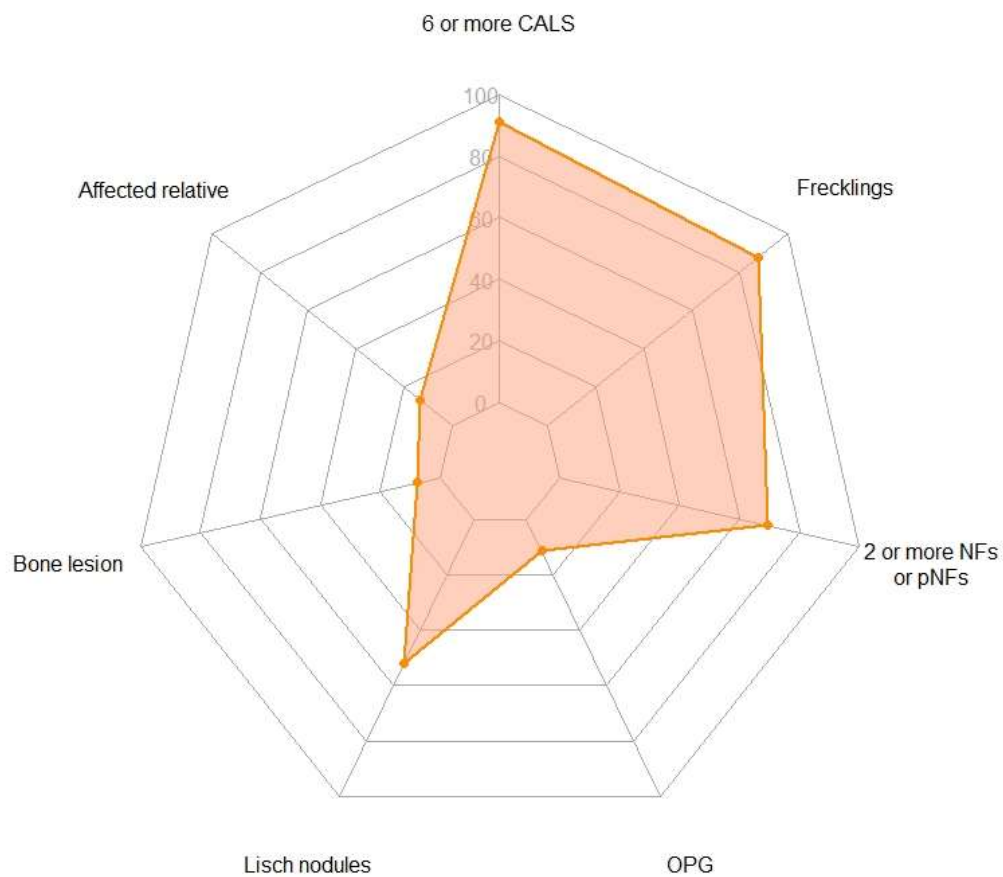

**Figure S2.** Radar plot for the fulfilling of the 6 clinical NIH criteria in the deleted cohort. CALS: café-au-lait spots; OPG: optic pathway glioma; pNFs: plexiform neurofibromas.

**Table S1.** Summary of the main clinical findings in patients with type-1, 2 and 3 *NF1* deletions in the French *NF1* cohort and comparison with “classic” *NF1*.

| Clinical features                                 | Type-1 deletion | Type-2 deletion | Type-3 deletion | “Classic” <i>NF1</i> phenotype <sup>a,b</sup> |
|---------------------------------------------------|-----------------|-----------------|-----------------|-----------------------------------------------|
| Age range                                         | 8 months-56 yo  | 1-64 yo         | 5-41 yo         |                                               |
| Median age (years)                                | 18              | 24              | 17,3            |                                               |
| Number of individuals                             | 71              | 21              | 5               |                                               |
| Male:Female                                       | 30:41           | 9:12            | 2:3             |                                               |
| > 5 CALS                                          | 50/58 (86%)     | 8/13 (62%)      | 3/3 (100%)      | 1,537/1,728 (89%)                             |
| Skinfold freckling                                | 54/62 (87%)     | 20/20 (100%)    | 4/4 (100%)      | 1,403/1,667 (84%)                             |
| Lisch nodules                                     | 23/44 (52%)     | 9/15 (60%)      | 3/4 (75%)       | 729/1,237 (59%)                               |
| Cutaneous neurofibromas <sup>d</sup>              | 31/31 (100%)    | 14/18 (78%)     | 2/2 (100%)      | 656/723 (91%)                                 |
| Subcutaneous neurofibromas <sup>d</sup>           | 24/28 (86%) ↗   | 9/15 (60%)      | 1/1 (100%)      | 297/515 (58%)                                 |
| Plexiform neurofibromas <sup>e,f</sup>            | 13/32 (41%) ↗   | 1/13 (8%)       | 1/3 (33%)       | 120/648 (18%)                                 |
| Symptomatic spinal neurofibromas                  | 2/23 (9%)       | 1/4 (25%)       | 1/2 (50%)       | 36/2,058 (2%)                                 |
| Symptomatic OPGs                                  | 2/43 (5%)       | 1/16 (6%)       | 0/5 (0%)        | 64/1,650 (4%)                                 |
| Asymptomatic OPGs                                 | 2/43 (5%)       | 0/16 (0%)       | 1/5 (20%)       | 70/519 (13%)                                  |
| Malignancies <sup>g</sup>                         | 4/46 (9%)       | 1/16 (6%)       | 0/3 (0%)        | 18/523 (3%)                                   |
| Skeletal abnormalities <sup>h</sup>               | 30/70 (43%) ↗   | 3/17 (18%)      | 4/4 (100%)      | 144/948 (15%)                                 |
| Scoliosis <sup>d</sup>                            | 10/29 (34%)     | 3/17 (18%)      | 2/2 (100%)      | 51/236 (22%)                                  |
| Dysmorphism                                       | 22/50 (44%) ↗   | 0/11 (0%)       | 2/5 (40%)       | 42/389 (11%)                                  |
| Pulmonic stenosis                                 | 2/30 (7%)       | 0/3 (0%)        | 0/1 (0%)        | 25/2,322 (1%)                                 |
| Short stature                                     | 3/49 (6%)       | 0/10 (0%)       | 0/4 (0%)        | 109/684 (16%)                                 |
| Macrocephaly                                      | 8/37 (22%)      | 1/8 (13%)       | 1/3 (33%)       | 239/704 (34%)                                 |
| Cognitive impairment and/or learning disabilities | 50/59 (85%) ↗   | 4/16 (25%)      | 4/4 (100%)      | 190/424 (45%)                                 |
| Cardiovascular abnormalities                      | 10/41 (24%) ↗   | 2/9 (22%)       | 0/2 (0%)        | 54/2,322 (2%)                                 |

Two-tailed exact Fisher test was applied to compare proportions of affected individuals between each deleted group and the “classic” *NF1* cohort. p-values were adjusted using the Benjamini-Hochberg (B-H) correction for multiple comparisons. Up (↗) and down (↘) arrows respectively indicate a significant increase and decrease in the prevalence of the features in the deleted group *versus* the “classic” *NF1* group at a 5% threshold after correction. CALS: café-au-lait spots; OPGs: optic pathway gliomas.

<sup>a</sup> Number of patients fulfilling the criteria and total number of patients for which information was provided.

<sup>b</sup> From Koczkowska *et al.* 2020 and Pasmant *et al.* 2010.

<sup>c</sup> When excluding the 21 patients for whom CALS were reported but without quantitative data.

<sup>d</sup> Individuals > 18 years old.

<sup>e</sup> Individuals > 8 years old.

<sup>f</sup> All plexiform neurofibromas in our group, visible plexiform neurofibromas in “classic” *NF1* group.

<sup>g</sup> Including MPNST, breast cancer, non-Hodgkin lymphoma and thoracic synovial sarcoma.

<sup>h</sup> Only including skeletal abnormalities, i.e., scoliosis, pectus abnormalities, feet malformations, pseudarthrosis, osteoporosis, genu valgum, large hands/feet, kyphosis, hyperlordosis, valgus forearm.

**Table S2.** Summary of clinical findings and statistical analysis *versus* “classic NF1” population from previously published and current genotype-phenotype correlations in NF1.

|                                              | <b>p.Met992del</b>           |                               | <b>p.Arg1809</b>                             | <b>Codons 844-848</b>         | <b>p.Met1149</b>              | <b>p.Arg1276</b>              | <b>p.Lys1423</b>              | <b>Deletions</b>       | <b>“Classic” NF1 population</b>     |
|----------------------------------------------|------------------------------|-------------------------------|----------------------------------------------|-------------------------------|-------------------------------|-------------------------------|-------------------------------|------------------------|-------------------------------------|
|                                              | Upadhyaya <i>et al.</i> 2007 | Koczkowska <i>et al.</i> 2019 | Rojnueangnit <i>et al.</i> 2015 <sup>a</sup> | Koczkowska <i>et al.</i> 2018 | Koczkowska <i>et al.</i> 2020 | Koczkowska <i>et al.</i> 2020 | Koczkowska <i>et al.</i> 2020 | Present study          | From Koczkowska <i>et al.</i> 2020. |
| Number of patients [index cases]             | 47 [21]                      | 135 [103]                     | 136 [98]                                     | 162 [129]                     | 69 [50]                       | 119 [101]                     | 93 [86]                       | 126 [122]              |                                     |
| CALS                                         | 47/47 (100)                  | 165/182 (90.7)                | 124/136 (91.2)                               | 130/157 (82.8) ↘              | 62/69 (90)                    | 111/119 (93.3)                | 86/91 (95)                    | 84/92 (91)             | 1537/1728 (89)                      |
| Frecklings                                   | 30/47 (64)                   | 105/171 (61.4) ↘*             | 54/80 (68)                                   | 104/144 (72.2) ↘*             | 40/65 (62) ↘*                 | 74/112 (66.1) ↘*              | 65/85 (76)                    | 98/112 (88)            | 1403/1667 (84.2)                    |
| Lisch nodules                                | 3/38 (8)                     | 16/139 (11.5) ↘*              | 10/119 (8.4) ↘                               | 42/98 (43) ↘*                 | 3/44 (7) ↘*                   | 19/70 (24) ↘*                 | 31/59 (53)                    | 40/77 (52)             | 729/1237 (58.9)                     |
| cNFs <sup>b</sup>                            | 0/18 (0) ↘                   | 0–1/57 (0–2) ↘*               | 0/59 (0) ↘                                   | 47/69 (68) ↘*                 | 0–3/24 (0–13) ↘*              | 14/40 (35) ↘*                 | 23/28 (82)                    | 59/64 (92)             | 656/723 (90.7)                      |
| scNFs <sup>b</sup>                           |                              | 0–3/36 (0–8) ↘*               | 0–5/59 (0–8) ↘                               | 33/65 (51)                    | 0–3/22 (0–14) ↘*              | 21/37 (57)                    | 13/23 (57)                    | 39/53 (74) ↗           | 297/515 (57.7)                      |
| Externally visible pNFs <sup>c</sup>         | 0/41 (0) ↘                   | 0/125 (0) ↘*                  | 0/107 (0) ↘                                  | 36/92 (39) ↗*                 | 0/42 (0) ↘*                   | 5/64 (8)                      | 14/48 (29)                    | 17/61 (28)             | 120/648 (18.5)                      |
| Symptomatic spinal NFs                       | 1/47 (2)                     | 1/165 (0.6)                   |                                              | 13/127 (10.2) ↗*              | 0/59 (0)                      | 18/97 (19) ↗*                 | 3/65 (5)                      | 6/35 (17) ↗*           | 36/2058 (1.8)                       |
| Symptomatic OPGs                             |                              | 0/170 (0) ↘*                  | 0/119 (0) ↘                                  | 12/136 (8.8) ↗*               | 0/58 (0)                      | 0/97 (0)                      | 1/74 (1)                      | 4/80 (5)               | 64/1650 (3.9)                       |
| Asymptomatic OPGs                            |                              | 1/41 (2) ↘                    |                                              | 18/63 (29) ↗*                 | 0/23 (0)                      | 1/48 (2)                      | 6/40 (15)                     | 5/80 (6)               | 70/519 (13.5)                       |
| Malignancies                                 |                              | 6/126 (4.8) (brain tumors)    |                                              | 13/139 (9.4) ↗*               | 0/57 (0)                      | 4/94 (4)                      | 7/77 (9)                      | 10/84 (12) ↗*          | 18/523 (3.4)                        |
| Skeletal abnormalities <sup>d</sup>          |                              | 30/172 (17.4)                 |                                              | 48/144 (33.3) ↗*              | 15/61 (25)                    | 32/100 (32) ↗*                | 34/83 (41) ↗*                 | 35/107 (33) ↗*         | 144/948 (15.2)                      |
| Scoliosis <sup>b</sup>                       | 2/20 (10)                    | 7/57 (12)                     | 6/71 (8) ↘                                   | 20/64 (31)                    | 2/20 (10)                     | 8/35 (23)                     | 10/27 (37)                    | 17/59 (29)             | 51/236 (21.6)                       |
| Pectus abnormalities                         | 7/45 (16) ↘                  | 9/125 (7.2) <sup>§</sup>      | 9/125 (7.2) ↘                                |                               | 8/61 (13) <sup>§</sup>        |                               |                               | 9/82 (11) <sup>§</sup> |                                     |
| Noonan-like features                         |                              | 19/166 (11.5) ↗*              | 32/122 (26.2)                                | 10/134 (7.5) ↗                | 18/62 (29) ↗*                 | 22/106 (20.8) ↗*              | 24/83 (29) ↗*                 |                        | 57/1683 (3.4)                       |
| Pulmonic stenosis                            | 4/47 (9) ↗                   | 8/160 (5) ↗*                  | 13/105 (12.4) ↗                              | 2/113 (1.8)                   | 2/52 (4)                      | 11/92 (12) ↗*                 | 11/76 (14) ↗*                 | 2/39 (5)               | 25/2322 (1.1)                       |
| Short stature                                | 5/47 (11) ↘                  | 16/118 (13.6)                 | 29/82 (35) ↗                                 | 15/91 (16)                    | 5/33 (15)                     | 14/80 (18)                    | 21/51 (41) ↗*                 | 3/77 (4) ↘*            | 109/684 (15.9)                      |
| Macrocephaly                                 | 4/45 (9) ↘                   | 30/132 (22.7) ↘               | 20/80 (25)                                   | 36/98 (37)                    | 19/45 (42)                    | 24/76 (32)                    | 15/51 (29)                    | 13/58 (22)             | 239/704 (33.9)                      |
| Cognitive impairment / learning disabilities | 8/47 (17) ↘                  | 58/176 (33) ↘*                | 71/127 (55.9)                                | 56/138 (40.6)                 | 31/66 (47)                    | 46/105 (43.8)                 | 36/87 (41)                    | 74/102 (73) ↗*         | 190/424 (44.8)                      |
| Cardiovascular abnormalities                 |                              |                               |                                              |                               | 5/52 (10)                     | 22/92 (24) ↗*                 | 19/76 (25) ↗*                 | 15/64 (23) ↗*          | 54/2.322 (2.3)                      |

Percentages are indicated into brackets. Up (↗) and down (↘) arrows indicate clinical findings that were described respectively significantly more or less frequently in the studied population *versus* the “classic” NF1 population at a 5% threshold. The asterisk (\*) indicates parameters that remained significant after correction for multiple testing with the Benjamini–Hochberg procedure, when applied (Koczkowska *et al.* 2018, Koczkowska *et al.* 2019, Koczkowska *et al.* 2020, present study). Clinical features that were described but not compared to “classic” NF1 population are indicated with an <sup>§</sup>. Reference cohort for “classic” NF1 group can vary between studies.

<sup>a</sup> Reported data included results from Rojnueangnit *et al.* 2015, Nyström *et al.* 2009, Ekvall *et al.* 2014, Pinna *et al.* 2015 and Santoro *et al.* 2015

<sup>b</sup> Patients aged ≥ 19 years old in Rojnueangnit *et al.* 2015, Koczkowska *et al.* 2018, Koczkowska *et al.* 2019, Koczkowska *et al.* 2020 and in present study; ≥ 20 years old in Upadhyaya *et al.* 2007.

<sup>c</sup> Patients aged ≥ 9 years old in Rojnueangnit *et al.* 2015, Koczkowska *et al.* 2018, Koczkowska *et al.* 2019, Koczkowska *et al.* 2020 and in present study; ≥ 10 years old in Upadhyaya *et al.* 2007

<sup>d</sup> Skeletal abnormalities can include scoliosis, kyphosis, pseudarthrosis, pectus abnormalities, sphenoid wing, long bones, hip or vertebral dysplasia, rib, feet or scapula abnormalities, osteoporosis, genu valgum, large hands/feet, kyphosis, hyperlordosis, valgus forearm, or cysts depending on the studies.
